# Supplementary figures and images for: Comprehensive analysis of cuproptosis-associated LncRNAs predictive value and related CeRNA network in acute myeloid leukemia
Source: PubMed Central journal article supplement — Heliyon. 2023 Nov 25;9(12):e22532. doi: 10.1016/j.heliyon.2023.e22532 (PMC10696213; doi:10.1016/j.heliyon.2023.e22532), 2023-11-25

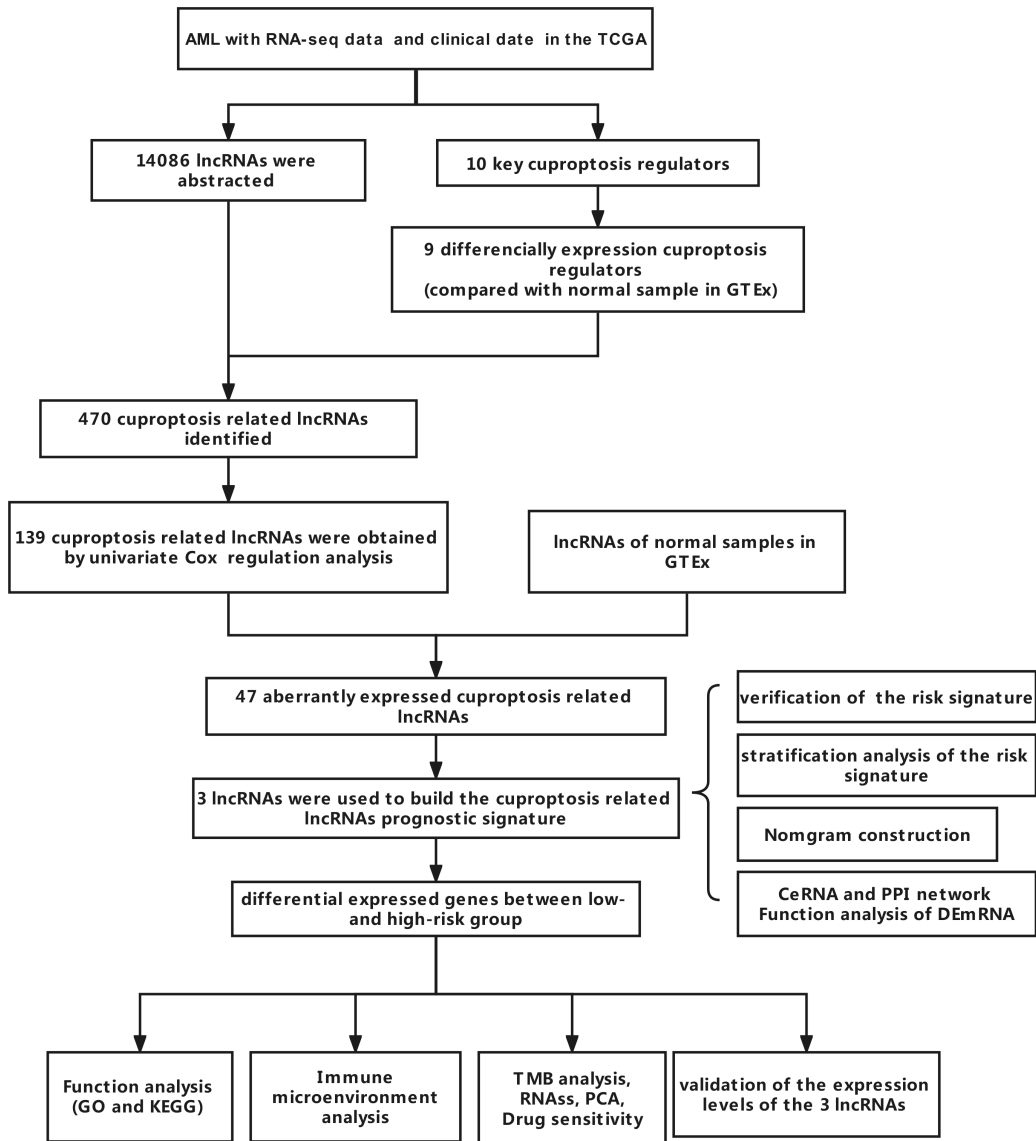

Supplement: mmc1.pdf [file mmc1.pdf]

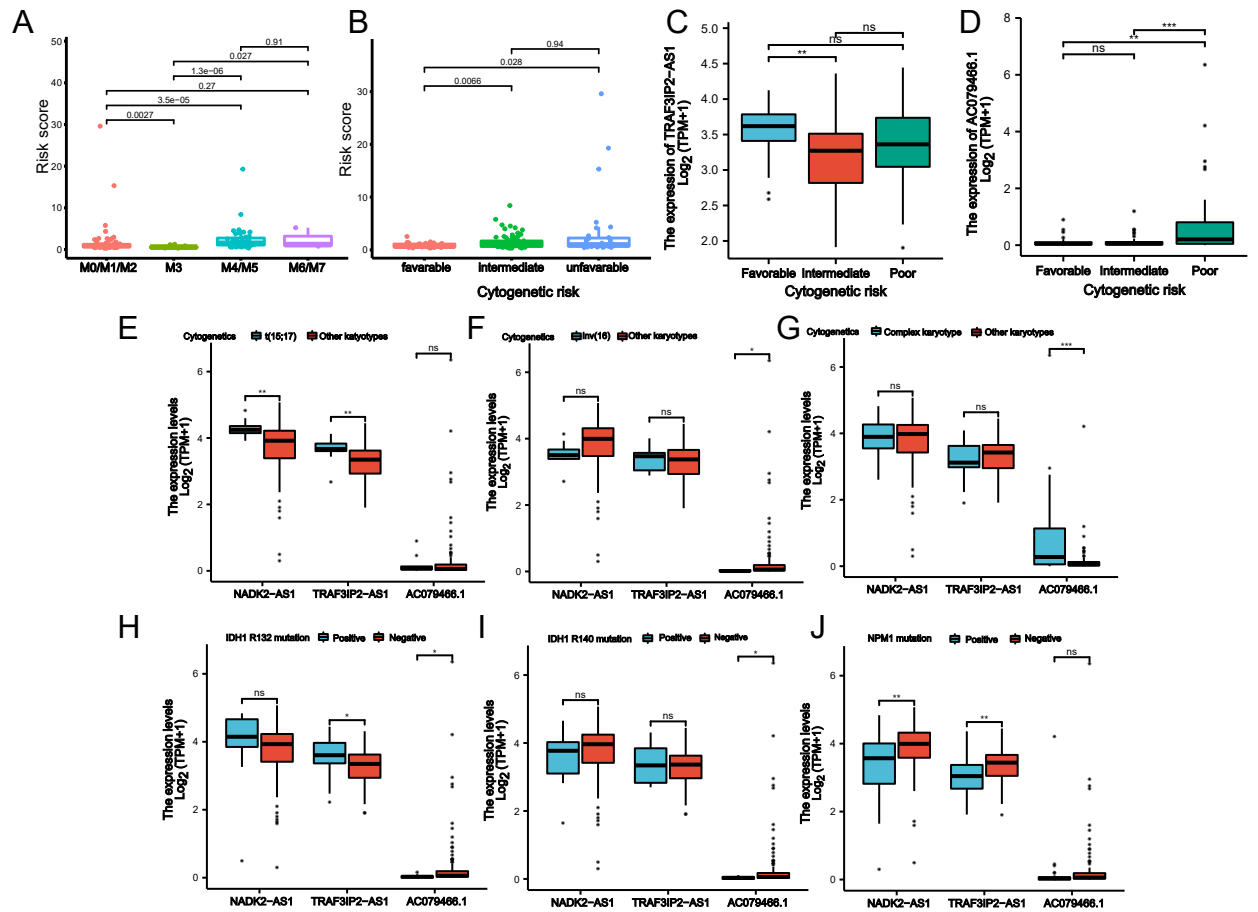

Supplement: mmc2.pdf [file mmc2.pdf]

A

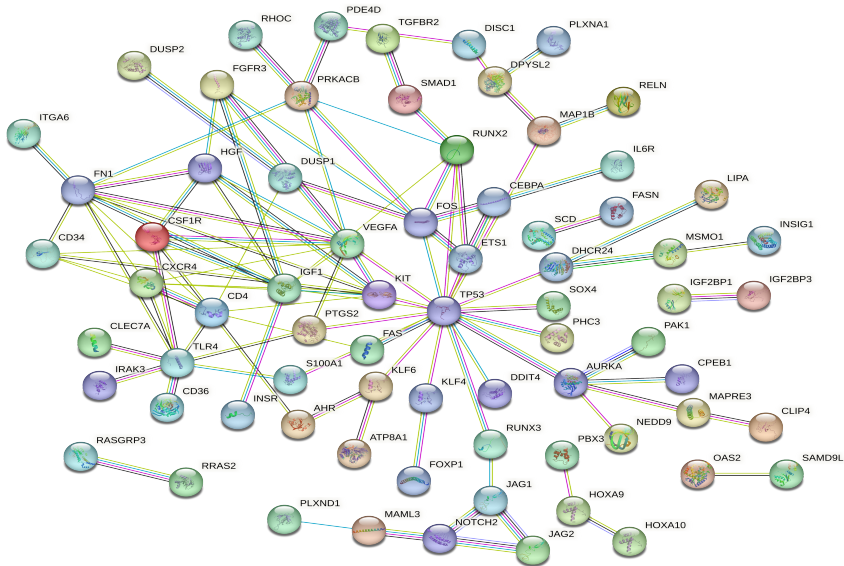

B

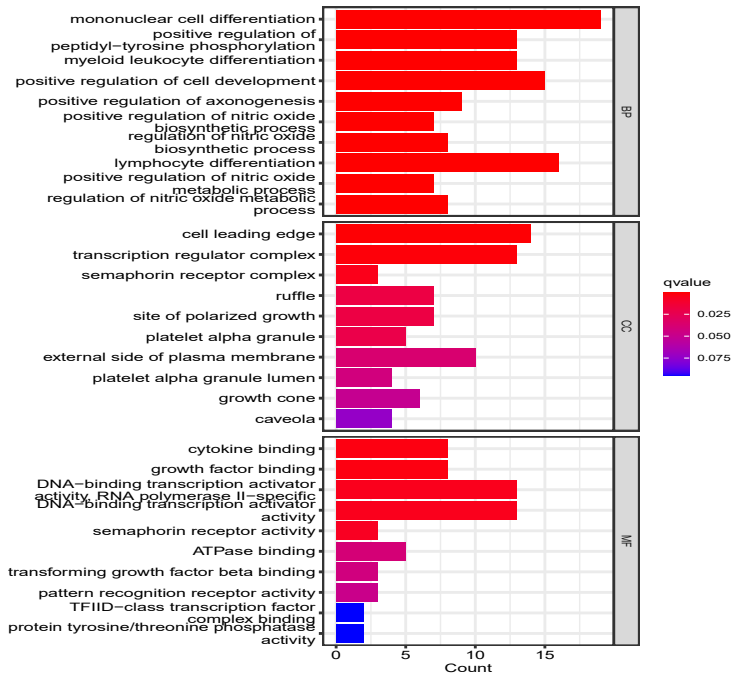

Supplement: mmc3.pdf [file mmc3.pdf]

**A**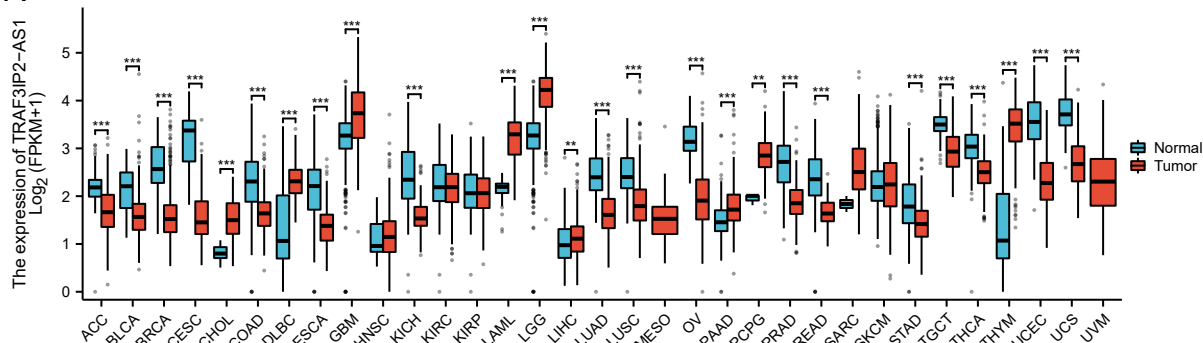**B**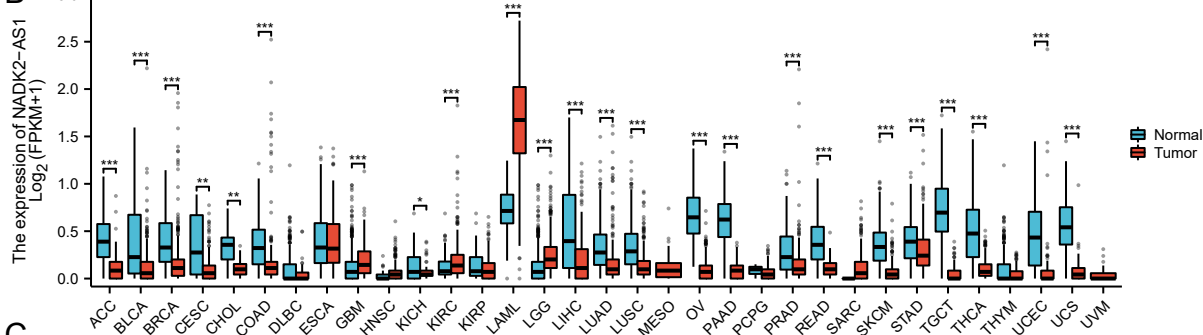**C**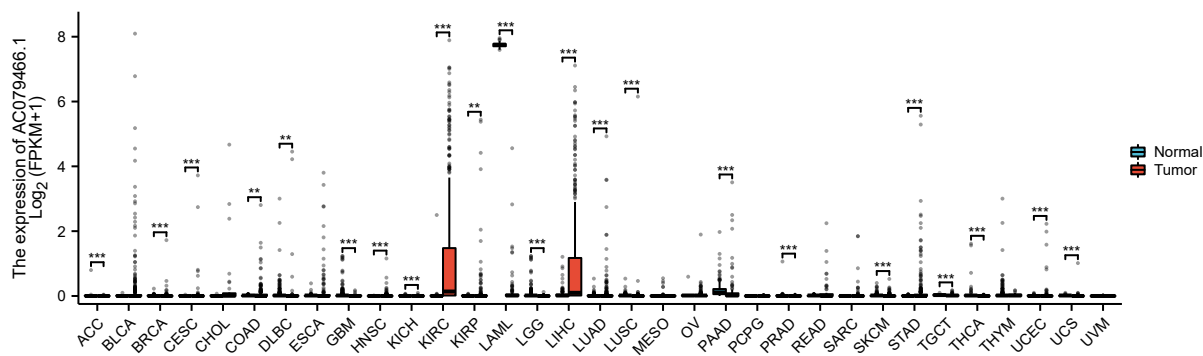

Supplement: mmc4.pdf [file mmc4.pdf]
